# Supplementary material for: Cortical activity associated with the maintenance of balance during unstable stances
Source: PeerJ. 2024 Apr 30;12:e17313. doi: 10.7717/peerj.17313 (PMC11067896; doi:10.7717/peerj.17313)
Supplement: Supplemental Information 3 — All data obtained from a total of 15 participants were used for statistical analysis. [file peerj-12-17313-s003.xlsx]

## Sheet: Sheet1
Tabe S1 RAW data of breaking points and variations
ID	Sound indication- BK1 (s)				BK1-BK2 (s)
	EO		EC		EO		EC
1	0.59		0.51		0.6		0.6
2	0.88		0.47		0.6		0.6
3	0.75		0.61		0.6		0.61
4	0.98		0.69		0.6		0.61
5	0.82		0.63		0.6		0.68
6	0.65		0.8		0.6		0.6
7	0.48		0.77		0.7		0.59
8	0.98		0.81		0.6		0.6
9	0.75		0.63		0.6		0.6
10	0.62		0.79		0.98		0.65
11	0.93		0.55		0.6		0.6
12	0.7		0.8		0.97		0.94
13	0.76		0.72		0.6		0.6
14	0.84		0.66		0.6		0.61
15	1.24		0.59		0.6		0.6
1st quartile	0.65		0.59		0.6		0.6
3rd quartile	0.93		0.79		0.6		0.61
median	0.76		0.66		0.6		0.6
1st quartile-1.5×IQR	0.24		0.3		0.4		0.47
3rd quartile+1.5×IQR	1.34		1.08		0.8		0.74
