# Supplementary material for: Cortical activity associated with the maintenance of balance during unstable stances
Source: PeerJ. 2024 Apr 30;12:e17313. doi: 10.7717/peerj.17313 (PMC11067896; doi:10.7717/peerj.17313)
Supplement: Supplemental Information 4 [file peerj-12-17313-s004.xlsx]

## Sheet: Sheet1
Tabe S2 RAW data of eye close points and variations
ID	Eye close (s)
	BP		UP
1	0.25		0.22
2	0.97		0.25
3	0.33		0.44
4	0.63		0.34
5	0.52		0.21
6	0.21		-0.13
7	0.48		0.22
8	0.49		0.4
9	0.72		0.63
10	0.29		0.31
11	0.21		0.34
12	0.44		0.27
13	0.41		0.39
14	0.64		0.2
15	0.38		0.58
1st quartile	0.29		0.22
3rd quartile	0.63		0.4
median	0.44		0.31
1st quartile-1.5×IQR	-0.23		-0.05
3rd quartile+1.5×IQR	1.14		0.67
