# Supplementary material for: Cortical activity associated with the maintenance of balance during unstable stances
Source: PeerJ. 2024 Apr 30;12:e17313. doi: 10.7717/peerj.17313 (PMC11067896; doi:10.7717/peerj.17313)
Supplement: Supplemental Information 5 [file peerj-12-17313-s005.xlsx]

## Sheet: Sheet1
Tabe S3 All data of the COP displacement underlying the findings described in postural control task 1
ID	Total distance								AP distance								ML distance								AP amplitude								ML amplitude
	EO				EC				EO				EC				EO				EC				EO				EC				EO				EC
	BP		UP		BP		UP		BP		UP		BP		UP		BP		UP		BP		UP		BP		UP		BP		UP		BP		UP		BP		UP
1	296.629		760.405		373.828		1542.53		189.251		386.727		272.197		785.354		181.823		573.469		199.565		1175.13		0.0659685		0.240628		0.119095		0.368532		0.0945509		0.348122		0.0709522		0.621395
2	158.355		601.195		211.579		1057.66		112.864		362.422		142.965		546.838		88.5017		404.535		124.968		802.663		0.0457293		0.209096		0.0636612		0.276792		0.054211		0.232361		0.0812531		0.459421
3	202.236		608.325		259.808		1755.18		118.205		371.757		167.834		944.705		136.744		403.505		160.325		1275.96		0.063388		0.194718		0.0679393		0.506947		0.0522585		0.228769		0.0766442		0.670773
4	186.664		1055.52		223.731		1967.52		128.065		464.719		170.665		939.575		105.078		857.24		109.339		1526.95		0.0647223		0.250372		0.0629229		0.4857		0.0411478		0.463011		0.0589816		0.826031
5	180.205		582.562		180.056		1232.05		123.83		335.914		124.843		626.125		105.479		404.975		101.721		928.545		0.0668224		0.165636		0.0532989		0.298371		0.0771261		0.196491		0.0487806		0.510333
6	329.749		937.482		382.665		1876.58		214.123		456.799		304.855		948.135		204.561		721.39		169.242		1392.16		0.0875551		0.265588		0.128147		0.445277		0.0908109		0.347671		0.164018		0.76873
7	199.173		1082.77		302.733		2148.29		158.008		512.415		242.435		953.205		91.1617		851.214		132.725		1721.4		0.0733267		0.287412		0.118502		0.513114		0.0431903		0.458765		0.0832882		0.910562
8	198.989		998.042		297.062		2215.47		147.228		613.344		236.265		1233.35		100.519		661.827		136.564		1505.3		0.072017		0.341576		0.0848222		0.725492		0.0595909		0.382099		0.0455603		0.967455
9	181.427		961.872		223.139		1576.08		115.398		545.08		149.525		924.73		114.952		700.558		133.105		1109.51		0.0589109		0.293344		0.0886897		0.538418		0.0625147		0.421828		0.0577956		0.624699
10	136.867		670.009		155.721		1278.06		100.238		344.875		117.75		625.845		72.59		506.877		78.0828		982.113		0.0821491		0.185536		0.0547097		0.281261		0.0397358		0.309425		0.0460386		0.50726
11	224.007		598.224		455.087		1724.06		147.96		299.485		252.752		823.665		137.245		448.945		321.093		1354.9		0.0529319		0.156749		0.105394		0.383073		0.0622011		0.239068		0.153334		0.662663
12	199.887		946.8		203.771		1749.95		154.248		610.205		160.505		937.372		96.3136		613.42		94.1633		1269.39		0.0804628		0.323549		0.0734494		0.47282		0.0568917		0.382345		0.0415761		0.699881
13	260.71		599.568		366.33		853.507		197.413		381.755		289.989		501.363		129.942		375.645		169.96		568.685		0.10049		0.190201		0.142618		0.258224		0.11287		0.19181		0.0785127		0.335678
14	197.627		894.262		333.395		1832.14		148.074		475.325		227.895		883.908		104.36		657.562		196.24		1428.43		0.0368081		0.261153		0.172008		0.405141		0.0309945		0.375612		0.0955275		0.790043
15	172.643		970.613		246.03		1806.55		123.308		501.203		156.538		914.675		96.9702		732.235		155.385		1358.41		0.0453724		0.341855		0.0780887		0.437405		0.0266797		0.404089		0.0657219		0.743428
1st quartile	180.205		601.195		211.579		1278.06		118.205		362.422		149.525		626.125		96.3136		404.975		109.339		982.113		0.0529319		0.190201		0.0636612		0.298371		0.0411478		0.232361		0.0487806		0.510333
3rd quartile	224.007		970.613		366.33		1876.58		158.008		512.415		252.752		944.705		136.744		721.39		169.96		1428.43		0.0804628		0.293344		0.119095		0.506947		0.0771261		0.404089		0.0832882		0.790043
median	198.989		894.262		259.808		1749.95		147.228		456.799		170.665		914.675		105.078		613.42		136.564		1275.96		0.0659685		0.250372		0.0848222		0.437405		0.0568917		0.348122		0.0709522		0.670773
1st quartile-1.5×IQR	103.316		315.678		81.6853		694.555		68.1393		213.785		55.9179		337.109		42.7989		159.215		21.1736		525.641		0.0271691		0.0969391		0.0105861		0.112071		0.00452646		0.0925097		-0.00596239		0.25253
3rd quartile+1.5×IQR	300.896		1256.13		496.224		2460.08		208.073		661.052		346.359		1233.72		190.259		967.15		258.126		1884.9		0.106226		0.386606		0.172171		0.693247		0.113747		0.54394		0.138031		1.04785
