# Supplementary material for: Cortical activity associated with the maintenance of balance during unstable stances
Source: PeerJ. 2024 Apr 30;12:e17313. doi: 10.7717/peerj.17313 (PMC11067896; doi:10.7717/peerj.17313)
Supplement: Supplemental Information 6 [file peerj-12-17313-s006.xlsx]

## Sheet: Sheet1
Tabe S4 All data of the COP displacement underlying the findings described in postural control task 2
ID	Total distance								AP distance								ML distance								AP amplitude								ML amplitude
	BP				UP				BP				UP				BP				UP				BP				UP				BP				UP
	EO		EC		EO		EC		EO		EC		EO		EC		EO		EC		EO		EC		EO		EC		EO		EC		EO		EC		EO		EC
1	222.683		227.045		910.117		1717.69		151.251		161.945		408.607		771.913		131.27		125.701		732.107		1366.87		0.17758		0.107159		0.207409		0.407702		0.0497443		0.0489458		0.428783		0.721727
2	154.944		198.057		449.242		1005.32		107.305		154.607		272.11		640.525		88.7217		93.3232		312.568		637.68		0.0868025		0.0621027		0.175281		0.296973		0.0648566		0.0257733		0.163476		0.338338
3	200.457		250.085		563.57		1562.06		125.43		175.333		346.11		916.67		129.422		142.025		369.89		1066.71		0.131749		0.114371		0.14567		0.44197		0.0490391		0.0834935		0.205396		0.531424
4	181.095		237.181		908.164		1703.33		120.578		199.168		432.682		1051.42		108.597		93.7844		713.345		1081.35		0.0938096		0.0765842		0.249531		0.539967		0.0360668		0.0376221		0.375352		0.649335
5	155.826		208.175		556.173		1235.5		101.089		153.905		352.533		692.477		96.4722		106.446		363.445		885.936		0.0403273		0.090944		0.179858		0.477634		0.041635		0.0383995		0.176292		0.649831
6	220.071		333.722		869.898		1740.96		179.218		265.672		393.135		817.595		97.9133		155.115		692.36		1356.63		0.0796754		0.118681		0.18076		0.458353		0.0384147		0.0507643		0.345169		0.779219
7	201.451		284.608		793.519		1642.24		153.866		230.53		381.62		808.91		95.6033		125.976		616.395		1263.24		0.0750135		0.10006		0.194805		0.358061		0.0596505		0.15197		0.348658		0.672591
8	227.815		310.222		846.22		1810.6		180.71		250.74		533.715		1074.99		106.108		139.279		539.67		1186.17		0.0766899		0.104463		0.270602		0.587884		0.0369675		0.0492842		0.291028		0.804008
9	166.241		228.852		798.485		2091.64		108.29		175.845		459.475		1479.33		102.354		111.342		571.405		1131.17		0.0528408		0.0760198		0.246251		1.41299		0.0423886		0.04304		0.291577		0.659169
10	121.324		148.108		598.646		1094.02		90.8538		110.863		325.125		543.165		62.0598		75.0969		438.92		835.695		0.0660686		0.0418798		0.152894		0.253878		0.0231569		0.0279725		0.251232		0.465577
11	174.205		260.98		549.884		1585.88		118.196		178.427		288.695		862.95		101.394		155.449		405.24		1164.73		0.0706347		0.0604274		0.15898		0.446624		0.0429701		0.0928168		0.230477		0.666552
12	197.807		196.884		968.074		1384.76		157.405		144.31		553.58		848.923		89.5561		105.149		680.43		919.988		0.131966		0.0577181		0.300811		0.462758		0.0305807		0.0408166		0.361702		0.529537
13	278.356		349.24		642.069		700.211		211.745		256.625		357.79		415.48		134.64		182.13		459.435		473.673		0.1004		0.0914416		0.149132		0.185801		0.0524604		0.063861		0.233219		0.270095
14	208.852		278.17		922.519		1936.5		150.644		183.685		537.165		1085.8		113.315		170.189		635.402		1326.63		0.0471545		0.0736102		0.289922		0.778375		0.0499486		0.134741		0.364856		0.732245
15	161.416		188.087		965.359		1630.49		107.372		132.72		545.465		793.97		96.1274		104.598		704.275		1238.79		0.0570614		0.0777548		0.294831		0.421819		0.0324843		0.0325293		0.43976		0.734048
1st quartile	161.416		198.057		563.57		1235.5		107.372		153.905		346.11		692.477		95.6033		104.598		405.24		885.936		0.0570614		0.0621027		0.15898		0.358061		0.0360668		0.0376221		0.230477		0.529537
3rd quartile	220.071		284.608		910.117		1740.96		157.405		230.53		533.715		1051.42		113.315		155.115		692.36		1263.24		0.1004		0.104463		0.270602		0.539967		0.0499486		0.0834935		0.364856		0.732245
median	197.807		237.181		798.485		1630.49		125.43		175.845		393.135		817.595		101.394		125.701		571.405		1131.17		0.0766899		0.0777548		0.194805		0.446624		0.0423886		0.0489458		0.291577		0.659169
1st quartile-1.5×IQR	103.8		112.969		297.936		674.684		54.9108		83.5909		204.122		309.862		67.6125		58.1272		186.29		488.822		0.00140525		0.0280757		0.0737983		-0.0747232		0.0193488		-0.0198515		0.0981648		0.29427
3rd quartile+1.5×IQR	277.687		369.696		1175.75		2301.78		209.866		300.844		675.703		1434.04		141.306		201.585		911.31		1660.35		0.156056		0.13849		0.355784		0.972751		0.0666666		0.140967		0.497168		0.967513
