# Supplementary material for: Cortical activity associated with the maintenance of balance during unstable stances
Source: PeerJ. 2024 Apr 30;12:e17313. doi: 10.7717/peerj.17313 (PMC11067896; doi:10.7717/peerj.17313)
Supplement: Supplemental Information 7 [file peerj-12-17313-s007.xlsx]

## Sheet: Sheet1
Tabe S5 All data of EEG underlying the findings described in postural control task 1
Theta
ID	Fp1								Fp2								F3								F4								C3								C4								P3
	EO				EC				EO				EC				EO				EC				EO				EC				EO				EC				EO				EC				EO
	BP		UP		BP		UP		BP		UP		BP		UP		BP		UP		BP		UP		BP		UP		BP		UP		BP		UP		BP		UP		BP		UP		BP		UP		BP
1	1.01441		2.49656		1.35171		1.76462		1.05923		1.30431		1.53214		2.02255		0.785111		2.8637		0.808322		1.09483		0.879803		1.58925		0.901509		1.12959		1.07824		2.38551		1.04609		1.27495		1.03854		1.22922		1.01755		1.15766		2.1395
2	2.79795		4.18876		1.58688		3.33963		1.89681		3.01647		1.42424		3.64172		1.94331		2.96797		1.27401		3.14494		2.08811		3.21145		1.3491		5.11552		1.50767		2.06857		1.45543		3.03986		1.36609		1.8847		1.36473		2.96718		2.33157
3	1.54418		2.22258		1.58465		2.96718		2.50767		2.74177		1.80642		2.80188		0.974634		1.33072		1.09631		1.90572		1.41279		1.69111		1.23383		1.89057		1.49407		1.72834		1.63645		1.98829		1.57639		2.0739		1.87478		2.11486		3.23899
4	0.66436		1.29795		0.808472		3.1971		1.11405		1.7234		1.28689		3.85811		4.48594		1.54179		0.847907		6.38115		0.985729		1.62377		0.868145		2.6252		1.02852		1.83336		1.18763		2.25357		0.93571		1.49141		1.20653		2.02226		2.25854
5	1.23436		1.91457		0.406502		0.841909		1.26418		2.14363		0.78444		1.56072		1.21804		1.8998		0.680486		1.44147		1.39886		2.37492		1.00299		2.08784		1.32997		1.68529		1.11833		1.72367		1.48373		2.00989		1.2745		1.83998		3.32595
6	0.498402		0.433773		0.643152		0.687089		0.635419		0.556136		0.658019		0.665029		0.69412		0.617717		0.681899		0.709763		0.750887		0.729104		0.529691		0.627947		1.19788		0.990238		1.30735		1.1663		1.13518		1.03885		1.19587		1.13833		1.7792
7	0.961393		1.4996		5.21047		4.46729		0.873811		1.47789		5.36492		4.43472		0.748763		1.10201		1.43454		1.36573		0.664468		1.03542		1.33402		1.20586		1.2005		1.53249		2.54964		1.99302		0.963224		1.3668		2.48738		1.79318		2.91426
8	0.765143		1.20005		2.76944		3.02603		0.914179		1.16211		2.732		3.04268		0.860722		1.20759		1.7691		1.70639		0.778609		1.1823		1.42841		1.43464		0.994988		1.42627		2.44225		1.71724		1.47008		1.66835		2.77309		1.86926		2.40681
9	4.33241		4.4201		3.19984		5.14853		3.56766		4.46879		2.28162		4.55475		2.72236		2.97417		2.08722		3.63473		3.10361		3.62715		2.20508		3.97014		2.21225		2.2417		2.07636		2.66463		2.81675		2.87393		2.22663		3.17303		9.18393
10	1.24752		1.90365		1.53874		2.46319		0.83656		1.14521		1.62673		2.85997		1.12967		1.61269		1.20608		1.74481		1.04271		1.34468		1.18775		2.11986		0.71799		0.994812		0.926108		1.13932		0.868701		1.19174		1.09713		1.50239		1.71863
11	1.96824		2.08405		3.66772		4.83515		1.82775		2.18929		3.14543		4.91066		1.86726		2.03563		2.27313		2.7581		2.00961		2.3622		2.16752		3.58724		2.09429		2.14839		2.57573		2.90135		2.1106		2.24195		2.42268		3.07881		3.93059
12	1.29132		1.93214		3.51702		6.37296		2.11602		2.71917		3.47444		5.97425		1.82938		2.22234		1.845		3.60184		1.81173		2.58279		1.891		3.83015		1.83514		2.28413		2.45702		3.40315		2.4217		2.50899		2.13965		3.10803		4.15502
13	0.564985		0.901677		0.894474		1.42279		1.10839		1.61088		1.17317		1.82958		0.600678		0.868427		0.904408		1.14312		0.807908		1.10411		1.14936		1.6353		0.903469		0.986727		1.80121		1.53907		0.758356		1.06693		2.15151		1.76639		2.03001
14	2.13215		1.60519		0.785902		1.20631		2.18366		1.64006		1.05732		2.1653		0.855663		1.23528		0.708065		1.21915		0.82468		1.1342		0.740342		1.18269		0.692504		1.2472		1.07482		1.27908		0.756889		0.929079		1.06272		1.16662		1.19485
15	1.25258		1.634		1.58009		3.40374		1.03683		1.37529		1.4879		3.20217		0.831953		1.0873		0.804076		1.79918		0.855833		1.13747		0.814369		1.50739		0.665812		0.93023		0.807811		1.33647		0.897655		1.04644		0.965649		1.31291		1.63667
1st quartile	0.765143		1.29795		0.808472		1.42279		0.914179		1.30431		1.17317		2.02255		0.785111		1.10201		0.804076		1.21915		0.807908		1.1342		0.868145		1.20586		0.903469		0.994812		1.07482		1.27908		0.897655		1.06693		1.09713		1.31291		1.7792
3rd quartile	1.96824		2.22258		3.19984		4.46729		2.11602		2.71917		2.732		4.43472		1.86726		2.22234		1.7691		3.14494		1.81173		2.37492		1.42841		3.58724		1.50767		2.14839		2.44225		2.66463		1.57639		2.0739		2.22663		2.96718		3.32595
median	1.24752		1.90365		1.58009		3.02603		1.11405		1.64006		1.53214		3.04268		0.974634		1.54179		1.09631		1.74481		0.985729		1.58925		1.18775		1.89057		1.19788		1.68529		1.45543		1.72367		1.13518		1.49141		1.36473		1.83998		2.33157
1st quartile-1.5×IQR	-0.745812		-0.320564		-1.2768		-1.09222		-0.293765		-0.154338		-0.697353		-0.111724		-0.771973		-0.0483387		-0.00170603		-0.982934		-0.225564		-0.156106		0.115541		-0.736521		0.173595		0.213151		0.115595		0.171241		-0.0473415		0.166955		0.15179		0.198829		-1.10759
3rd quartile+1.5×IQR	3.47919		3.84109		5.28511		6.98231		3.32397		4.17782		4.60253		6.569		3.42434		3.37269		2.57488		5.34702		2.84521		3.66523		2.18101		5.52962		2.23754		2.93005		3.40148		3.77247		2.52138		2.97388		3.17198		4.08126		6.21273
Alpha
ID	Fp1								Fp2								F3								F4								C3								C4								P3
	EO				EC				EO				EC				EO				EC				EO				EC				EO				EC				EO				EC				EO
	BP		UP		BP		UP		BP		UP		BP		UP		BP		UP		BP		UP		BP		UP		BP		UP		BP		UP		BP		UP		BP		UP		BP		UP		BP
1	0.474913		0.747309		1.2383		1.15932		0.501109		0.65505		1.1977		1.19344		0.372659		0.905473		0.707209		0.659131		0.472305		0.64657		0.558647		0.549644		0.491441		1.10394		1.12478		1.1219		0.512111		0.520837		0.982939		0.9828		1.10598
2	0.897576		1.21588		0.773711		0.928073		0.613838		0.780357		0.853487		0.944301		0.714906		0.930549		0.55414		0.845851		0.766869		0.968716		0.688619		1.24508		0.496387		0.645948		0.662865		0.987189		0.49454		0.683427		0.875801		0.826565		0.76784
3	0.769949		0.790164		1.00657		1.11025		1.132		1.22078		0.998607		1.28891		0.532583		0.557137		0.780148		0.871574		0.672959		0.7195		0.653197		0.835074		0.95654		1.13207		1.31964		1.28774		1.08109		1.18465		1.3453		1.31092		2.15171
4	0.721633		0.456956		1.2985		1.0639		1.01484		0.745917		1.63139		1.47814		1.58665		0.529641		1.27399		2.17987		0.589692		0.502367		1.22744		0.967926		0.987278		0.775814		8.86867		5.33021		0.983742		0.732059		7.25045		5.71075		3.38703
5	0.73956		0.806157		0.440903		0.675681		0.844622		0.870026		0.585041		0.783506		0.531478		0.744737		0.45124		0.747741		0.742414		0.909467		0.586169		0.83566		1.46916		1.00201		1.5387		1.32318		1.25675		1.16473		1.40622		1.0995		4.96055
6	0.276083		0.248461		0.427833		0.489173		0.36188		0.368534		0.493204		0.452901		0.377173		0.358588		0.438967		0.429795		0.480492		0.469334		0.387596		0.397006		0.610065		0.63834		0.812732		0.849639		0.820345		0.721324		0.939008		0.944133		1.16274
7	0.514906		0.636551		2.49789		2.02919		0.443414		0.560546		2.28176		1.69434		0.402144		0.455555		0.980763		0.810622		0.348842		0.375692		0.653018		0.487082		0.719307		1.09032		2.90382		1.64259		0.640041		0.698419		2.11246		1.04715		2.89341
8	0.522224		0.703528		18.5594		6.62131		0.560438		0.759956		20.4502		6.97606		0.883752		0.780228		6.44939		2.51285		0.661405		0.740816		7.58091		2.48256		2.66009		1.48249		17.4737		8.12457		1.16118		1.00355		10.1057		6.9089		2.83398
9	3.20319		1.88203		3.10972		2.302		3.44658		2.01978		2.73601		2.06717		2.23879		1.41159		2.50618		1.66053		2.64563		1.71106		2.3153		1.88732		3.56015		2.41021		9.5466		7.20112		4.22752		2.55889		5.02845		2.83632		17.9425
10	0.53974		0.624903		1.97675		1.84126		0.379703		0.425673		2.14458		1.84713		0.479505		0.468388		1.13419		1.13649		0.434775		0.544668		1.6836		1.2956		0.53029		0.565751		3.02667		2.71106		0.804966		0.622035		4.18752		3.56281		1.97836
11	0.640775		0.710969		0.899845		1.09393		0.647931		0.627534		0.85566		1.01857		0.590566		0.678014		0.613563		0.7167		0.670069		0.667861		0.6434		0.844958		0.851724		0.722056		0.730553		0.834778		0.885184		0.815157		0.835532		0.805541		1.64257
12	0.925281		0.597782		4.63747		5.12203		1.47716		0.889494		4.5436		5.59798		1.15824		0.708151		2.19121		2.31997		1.48747		0.842103		2.65537		3.21883		2.85215		1.30078		5.44355		3.91579		3.04485		1.0267		5.32168		4.68783		14.2156
13	0.639674		0.583054		1.50912		1.21828		0.919985		0.824418		2.19084		1.71761		0.79549		0.756347		1.58453		1.21881		0.916243		0.650138		2.24221		1.96459		2.26933		1.59693		8.89694		6.64101		3.48758		2.58092		7.35409		10.9709		8.34118
14	0.49363		0.538516		0.575808		0.571757		0.565985		0.532075		0.840211		1.08414		0.295834		0.385867		0.446771		0.521031		0.299203		0.345918		0.546841		0.638168		0.341876		0.481904		1.31047		0.831565		0.458076		0.456406		0.938358		0.904064		0.710377
15	0.531526		0.556126		3.20687		4.50414		0.561198		0.493015		3.23289		4.45232		0.45545		0.433473		1.33793		1.61649		0.573709		0.466364		1.29615		1.317		0.486564		0.476754		2.23177		2.07437		0.678905		0.538644		2.9316		2.28421		1.09074
1st quartile	0.514906		0.556126		0.773711		0.928073		0.501109		0.532075		0.853487		1.01857		0.402144		0.455555		0.55414		0.7167		0.472305		0.469334		0.586169		0.638168		0.496387		0.63834		1.12478		0.987189		0.640041		0.622035		0.939008		0.944133		1.10598
3rd quartile	0.769949		0.790164		3.10972		2.302		1.01484		0.870026		2.73601		2.06717		0.883752		0.780228		1.58453		1.66053		0.766869		0.842103		2.24221		1.88732		2.26933		1.30078		8.86867		5.33021		1.25675		1.16473		5.32168		4.68783		4.96055
median	0.639674		0.636551		1.2985		1.15932		0.613838		0.745917		1.63139		1.47814		0.532583		0.678014		0.980763		0.871574		0.661405		0.650138		0.688619		0.967926		0.851724		1.00201		2.23177		1.64259		0.885184		0.732059		2.11246		1.31092		2.15171
1st quartile-1.5×IQR	-0.517637		-0.0114939		-6.0083		-1.86347		-0.654094		-0.0732986		-6.58229		-1.86369		-0.398789		0.0442673		-1.73351		-0.304881		-0.409474		-0.0326969		-2.14085		-0.569689		-1.05802		-0.143869		-6.11087		-2.89038		-1.15032		-0.379446		-3.51336		-3.49064		-6.69758
3rd quartile+1.5×IQR	1.80249		1.35778		9.89173		5.09355		2.17004		1.4754		10.1718		4.94943		1.68469		1.19152		3.87219		2.68211		1.64865		1.34413		4.96922		3.09518		3.82373		2.08299		16.1043		9.20778		3.04711		2.16621		9.77405		9.12261		12.7641
Beta
ID	Fp1								Fp2								F3								F4								C3								C4								P3
	EO				EC				EO				EC				EO				EC				EO				EC				EO				EC				EO				EC				EO
	BP		UP		BP		UP		BP		UP		BP		UP		BP		UP		BP		UP		BP		UP		BP		UP		BP		UP		BP		UP		BP		UP		BP		UP		BP
1	0.762576		0.649158		0.986687		1.10428		0.713564		0.790726		1.19122		1.39464		0.527522		0.538705		0.590014		0.584545		0.898844		0.790283		0.659015		0.734164		0.688881		0.68431		0.79294		0.757207		0.621762		0.661949		0.763553		0.69269		1.54984
2	1.6008		1.75947		0.922806		1.1234		1.0656		1.05654		0.947907		1.15898		1.10686		1.44672		0.819003		1.16243		1.2303		1.41156		0.84301		1.21257		0.778514		0.929907		0.90303		1.08072		0.744571		0.872453		0.807387		1.04107		1.1994
3	2.03695		2.09899		2.12433		2.24449		2.62205		2.8483		2.5149		2.86873		1.65134		1.51761		1.8481		1.93539		1.96505		2.15822		2.08256		1.96278		2.53791		2.69849		2.81689		3.01732		2.84973		3.63342		4.09115		3.52365		4.51821
4	0.277309		0.306783		0.513277		0.659156		2.58374		2.35745		1.73593		1.91591		1.13979		0.500992		0.558737		1.38242		0.559585		0.611303		0.656379		0.704802		0.882456		0.659776		1.20202		0.959268		0.521989		0.520841		1.07886		0.833596		1.15686
5	1.04116		0.91567		0.314731		0.496487		1.27667		1.08342		0.654844		0.845822		0.93929		0.949973		0.576007		0.763536		1.23822		1.18006		0.686456		1.00796		0.936856		0.918302		0.977232		1.18545		0.893487		0.841792		0.866009		0.900439		2.52712
6	0.41609		0.456816		0.754881		0.671357		0.909534		1.23394		0.849797		0.7013		0.619437		0.664033		0.816572		0.713256		0.824256		0.99954		0.611489		0.646073		0.915732		0.845174		0.958379		0.867587		1.12916		1.04336		1.15085		1.18361		1.29143
7	0.765757		0.653129		1.31504		1.12284		0.875982		0.752929		1.50403		1.08766		0.634236		0.534091		0.581837		0.497667		0.749803		0.660106		0.796777		0.57727		0.726192		0.655889		1.10675		0.860398		0.631314		0.538363		0.6251		0.461644		1.52089
8	0.741777		0.631898		1.87862		1.48644		1.60902		1.45244		1.85487		1.56218		0.713275		0.643574		0.960638		0.816952		1.70529		1.74826		0.932844		0.748234		1.05848		0.817941		1.62754		1.01942		0.812782		0.76993		1.41582		1.16204		1.79747
9	1.46217		1.52763		1.49044		1.38355		1.3452		1.39395		1.21094		1.11589		1.02538		0.960233		1.08444		1.10787		1.33587		1.45735		1.3864		1.18609		1.12617		1.16591		1.29486		1.34486		1.16877		1.07276		1.57179		1.29643		3.77154
10	0.531829		1.023		0.809163		0.683524		0.326302		0.645615		1.14918		0.925323		0.474188		0.501997		0.572745		0.523882		0.701877		0.700991		0.905834		0.712493		0.528278		0.888444		0.691593		0.54762		0.586558		0.693423		0.751381		0.611919		1.12808
11	0.797725		0.78489		1.28562		1.49723		0.761153		0.728151		1.2133		1.40592		0.928859		0.911404		0.96526		1.09921		1.00565		0.922486		0.867402		1.00182		1.30635		1.18493		1.45488		1.7763		1.08751		1.04536		1.91513		2.14331		1.7635
12	1.01111		1.65204		3.36831		3.79761		2.83103		2.43796		3.26518		3.80949		1.5997		2.12462		1.81011		2.17115		2.27496		2.5456		1.9618		2.44093		2.02379		2.09459		2.31263		2.1484		2.03812		2.05887		2.36711		2.1421		4.69124
13	0.383355		0.43191		0.599714		0.536095		0.84486		0.864041		1.06622		0.824937		0.433781		0.475217		0.614992		0.52993		0.575764		0.560928		1.05141		0.715396		0.658326		0.655907		1.24859		0.965755		0.613953		0.560775		1.44372		1.08457		1.61047
14	0.585385		0.707877		0.601994		0.599174		0.590883		0.623252		1.10399		1.04686		0.500237		0.612217		0.487416		0.520216		0.561397		0.552129		0.694686		0.687816		0.581603		0.709181		0.756822		0.742209		1.09145		0.999081		1.0516		1.10737		0.747084
15	0.902407		0.844257		1.78148		1.74641		0.956429		0.786679		1.89434		1.72457		0.781227		0.694449		1.01059		0.975232		0.935725		0.729853		1.0874		0.93924		0.88682		0.701105		1.62477		1.04766		1.19713		0.86485		1.99291		1.3765		2.04855
1st quartile	0.531829		0.631898		0.601994		0.659156		0.761153		0.752929		1.06622		0.925323		0.527522		0.534091		0.576007		0.52993		0.701877		0.660106		0.686456		0.704802		0.688881		0.68431		0.90303		0.860398		0.621762		0.661949		0.807387		0.833596		1.1994
3rd quartile	1.04116		1.52763		1.78148		1.49723		1.60902		1.45244		1.85487		1.72457		1.10686		0.960233		1.01059		1.16243		1.33587		1.45735		1.0874		1.18609		1.12617		1.16591		1.62477		1.34486		1.16877		1.04536		1.91513		1.3765		2.52712
median	0.765757		0.78489		0.986687		1.12284		0.956429		1.05654		1.21094		1.15898		0.781227		0.664033		0.816572		0.816952		0.935725		0.922486		0.867402		0.748234		0.88682		0.845174		1.20202		1.01942		0.893487		0.86485		1.15085		1.10737		1.61047
1st quartile-1.5×IQR	-0.199247		-0.180661		-0.59188		-0.634246		-0.416759		-0.320176		0.0327088		-0.338891		-0.0473056		-0.181169		-0.0666036		-0.242511		-0.0875001		-0.262748		0.000594224		-0.0836344		-0.13975		-0.196487		0.014831		-0.104122		-0.316123		-0.535994		-0.529589		-0.333544		-0.670278
3rd quartile+1.5×IQR	1.77224		2.34019		2.97536		2.79064		2.78693		2.52555		2.88837		2.98878		1.68169		1.67549		1.6532		1.93487		2.12525		2.38021		1.77326		1.97453		1.95481		2.04671		2.51297		2.30938		2.10666		2.2433		3.2521		2.54364		4.3968
Gamma
ID	Fp1								Fp2								F3								F4								C3								C4								P3
	EO				EC				EO				EC				EO				EC				EO				EC				EO				EC				EO				EC				EO
	BP		UP		BP		UP		BP		UP		BP		UP		BP		UP		BP		UP		BP		UP		BP		UP		BP		UP		BP		UP		BP		UP		BP		UP		BP
1	0.684678		0.626924		0.821955		1.14387		0.737636		0.803264		1.09961		1.61767		0.408471		0.392502		0.383865		0.409056		0.951995		0.867405		0.438784		0.729423		0.417971		0.407222		0.388292		0.418101		0.359289		0.363738		0.338201		0.377569		0.618556
2	1.46574		1.65082		0.845217		0.985371		0.961342		0.976109		0.832096		1.17166		0.877811		1.02337		0.880594		0.974113		0.998905		1.1778		0.767605		0.965074		0.639588		0.767372		0.786484		0.898993		0.57674		0.663559		0.551123		0.783041		0.674854
3	0.769938		0.83526		0.745243		1.44548		1.15182		1.18888		1.07526		2.87803		0.644014		0.606613		0.555111		0.905564		0.563056		0.529509		0.559742		0.972944		0.832217		0.802661		0.540782		1.2088		0.699637		0.609689		0.576686		1.17964		0.962033
4	0.285002		0.274767		0.354882		0.399459		4.85659		4.82442		2.68461		2.75457		0.732865		0.429167		0.350658		0.452546		0.498837		0.463044		0.370561		0.419361		1.82019		0.945435		0.474117		0.463933		0.433835		0.427122		0.346293		0.424269		0.947503
5	1.04116		0.91567		0.314731		0.496487		1.27667		1.08342		0.654844		0.845822		0.93929		0.949973		0.576007		0.763536		1.23822		1.18006		0.686456		1.00796		0.936856		0.918302		0.977232		1.18545		0.893487		0.841792		0.866009		0.900439		2.52712
6	0.422397		0.377285		0.85897		0.713948		1.68232		3.73452		1.2959		0.891076		0.490756		0.489379		0.857252		0.728693		0.725032		1.15829		1.10844		1.1931		0.690473		0.647992		0.946709		0.820626		1.55991		1.66653		2.24157		2.49541		0.838969
7	0.51288		0.444611		1.05977		0.935288		0.902098		0.608094		1.04237		0.848707		0.34328		0.298295		0.300104		0.281451		0.401853		0.316151		0.323748		0.283612		0.47673		0.533666		1.41017		1.09888		0.285565		0.379857		0.35995		0.244611		0.465797
8	0.620206		0.723149		1.24487		1.66626		2.16566		2.07448		0.913681		1.77726		0.510722		0.611573		0.512846		0.779288		1.66301		2.62563		0.378836		0.708311		0.458917		0.554056		0.447676		0.599634		0.357576		0.512617		0.39289		0.710436		0.744114
9	1.29713		1.45515		1.17931		1.17927		1.00217		1.26765		0.820731		0.778679		0.645357		0.66512		0.579273		0.621316		1.04769		1.55322		0.917367		0.743898		0.513644		0.456014		0.508068		0.500201		0.542947		0.527208		0.545845		0.52832		0.868745
10	0.638019		2.37939		0.805153		0.716396		0.509563		1.61568		1.1946		1.07586		0.465563		0.869824		0.541103		0.474013		1.93789		1.91724		1.05724		1.00669		0.823838		3.12239		0.329492		0.325912		0.787718		2.03946		0.304388		0.306708		1.20852
11	1.09552		1.07672		2.07436		2.60332		0.987748		1.04374		2.14095		2.62735		1.48653		1.50978		1.80907		2.08802		1.57267		1.5716		1.57897		1.58262		2.65059		2.89426		3.93402		4.68109		2.32107		2.26024		6.73689		8.18921		2.19587
12	0.417182		0.632811		1.62413		2.32703		4.03402		1.23187		1.51641		2.27161		0.899811		0.789613		0.52495		0.982286		0.92548		0.913095		0.533837		1.07054		0.636856		0.718896		0.686971		0.822992		0.643193		0.737904		0.50502		0.687049		1.13075
13	0.38169		0.36766		0.450311		0.418578		0.773778		0.852322		0.668203		0.642519		0.353771		0.369159		0.430847		0.375848		0.360335		0.348372		0.426144		0.398756		0.407563		0.386152		0.607012		0.493408		0.289612		0.277016		0.319491		0.301852		0.495429
14	0.790118		0.799397		0.58488		1.02931		0.799399		0.778703		1.18147		1.65747		0.88647		0.813362		0.609634		0.825109		1.20635		1.01743		0.995496		1.10904		1.01241		1.11016		0.817294		1.05376		2.96193		2.57963		2.01425		2.24797		0.772126
15	0.511191		0.711244		0.793632		1.16717		0.41983		0.550816		0.759844		1.11461		0.379002		0.449935		0.39124		0.608707		0.313695		0.388894		0.3398		0.634947		0.338749		0.379615		0.363882		0.505798		0.342257		0.378236		0.33891		0.537539		0.671215
1st quartile	0.422397		0.444611		0.58488		0.713948		0.773778		0.803264		0.820731		0.848707		0.408471		0.429167		0.39124		0.452546		0.498837		0.463044		0.378836		0.634947		0.458917		0.456014		0.447676		0.493408		0.357576		0.379857		0.33891		0.377569		0.671215
3rd quartile	1.04116		1.07672		1.17931		1.44548		1.68232		1.61568		1.2959		2.27161		0.88647		0.869824		0.609634		0.905564		1.23822		1.55322		0.995496		1.07054		0.936856		0.945435		0.946709		1.09888		0.893487		1.66653		0.866009		1.17964		1.13075
median	0.638019		0.723149		0.821955		1.02931		0.987748		1.08342		1.07526		1.17166		0.644014		0.611573		0.541103		0.728693		0.951995		1.01743		0.559742		0.965074		0.639588		0.718896		0.607012		0.820626		0.57674		0.609689		0.50502		0.687049		0.838969
1st quartile-1.5×IQR	-0.104583		-0.403026		-0.122985		-0.255166		-1.1587		-1.00687		-0.01862		-0.310126		-0.0567085		-0.0506158		-0.160114		-0.194211		-0.249952		-0.513711		-0.170815		0.120046		-0.471124		-0.826052		-0.891729		-1.09534		-0.839009		-0.783375		-2.17177		-2.64468		-0.214913
3rd quartile+1.5×IQR	1.56814		1.92436		1.88717		2.4146		3.6148		3.42581		2.13525		3.43044		1.35165		1.34961		1.16099		1.55232		1.98701		2.52998		1.54515		1.58544		1.8669		2.2275		2.28611		2.68763		2.09007		2.82976		3.37669		4.20189		2.01688
