# Supplementary material for: Cortical activity associated with the maintenance of balance during unstable stances
Source: PeerJ. 2024 Apr 30;12:e17313. doi: 10.7717/peerj.17313 (PMC11067896; doi:10.7717/peerj.17313)
Supplement: Supplemental Information 8 [file peerj-12-17313-s008.xlsx]

## Sheet: Sheet1
Tabe S6 All data of EEG underlying the findings described in postural control task 2
Theta
ID	Fp1								Fp2								F3								F4								C3								C4								P3
	BP				UP				BP				UP				BP				UP				BP				UP				BP				UP				BP				UP				BP
	EO		EC		EO		EC		EO		EC		EO		EC		EO		EC		EO		EC		EO		EC		EO		EC		EO		EC		EO		EC		EO		EC		EO		EC		EO
1	0.746147		3.11096		1.39869		1.44045		0.860113		1.02505		1.66291		1.53758		0.802732		2.81248		0.760595		0.771745		0.816644		1.37804		1.02145		0.980196		1.06515		2.00752		1.23237		1.4357		0.973882		1.74942		1.05659		1.26262		2.19947
2	2.37968		1.68832		2.77334		8.3972		2.55829		1.91261		2.31695		4.3433		1.53112		1.40693		1.69646		3.30456		2.38426		2.09737		2.15464		5.10249		1.44481		1.27469		1.48408		2.26181		1.48898		1.54001		1.51927		2.2047		2.51282
3	1.69602		2.08097		2.43441		3.05581		2.00214		1.97799		2.18743		3.51733		1.1706		1.48124		1.58059		1.92192		1.44679		1.39605		1.59137		2.11473		2.39495		1.83455		1.97227		2.53237		2.03658		1.63763		2.40544		2.47547		4.05472
4	0.67775		0.968812		1.47413		2.05137		1.08143		1.37492		2.10234		2.87342		1.21886		1.15605		1.83998		5.46893		0.929871		1.25724		1.71882		2.40519		0.976875		1.49977		1.75523		2.02202		0.938052		1.16929		1.22986		1.77902		1.95372
5	0.612999		0.578409		0.886089		1.35543		0.69565		0.799448		1.15977		1.69686		0.82559		0.907598		1.25979		2.00367		0.978739		1.16378		1.44765		2.25562		1.16363		1.20125		1.60741		1.80908		1.17365		1.31105		1.72283		2.01297		2.51418
6	0.37444		0.352998		0.458756		0.512776		0.547143		0.578952		0.701693		0.66045		0.540654		0.5642		0.599293		0.727546		0.688775		0.733224		0.745352		0.892394		0.832365		0.997646		1.08692		1.08912		1.00795		0.813721		0.845843		0.890997		1.26698
7	1.10645		1.28601		0.998101		1.40358		1.79636		1.75882		1.23656		1.84421		0.796179		1.0621		0.888727		1.07291		0.956378		1.32486		0.90773		1.2159		1.42593		2.75778		1.78221		2.25235		1.15583		2.05552		1.32381		1.86357		3.814
8	1.08682		4.05726		1.32992		1.38538		1.53587		3.7078		1.34348		1.58574		1.02307		3.02347		1.2826		1.15503		0.827876		2.3655		1.1169		1.37582		1.38981		3.84427		1.54912		1.77917		1.31869		4.96482		1.29648		2.3346		3.03646
9	3.86117		3.83496		3.4955		4.98623		3.54209		4.04024		3.54831		4.6564		2.58396		2.68532		2.68636		3.68193		2.76663		2.97133		3.33429		4.4026		1.97032		2.36448		2.24604		2.22675		2.18362		2.69681		2.59707		2.69646		9.62676
10	1.72477		1.57542		1.12013		1.41241		1.28027		1.28501		0.918512		1.41456		1.38212		1.18725		0.895356		1.24087		1.23505		1.32575		0.939504		1.38119		0.772863		0.845578		0.847437		1.05977		0.864299		0.981445		1.02012		1.34151		1.77796
11	1.43989		1.68752		2.45405		4.01857		1.44387		1.57888		2.66502		3.37703		1.44005		1.62116		1.85712		2.89787		1.76958		1.94068		2.49506		3.16872		1.95035		2.25979		2.46122		3.40782		1.85014		2.27554		2.55245		3.71704		3.5245
12	1.47644		2.27797		2.23172		4.01141		1.95846		3.05908		3.22996		4.93237		1.51381		2.19641		2.31983		4.09985		1.55756		2.58416		2.90545		4.51932		1.67318		2.1588		2.33731		4.20991		1.50257		2.67568		2.49071		4.8358		3.66788
13	0.449581		0.657724		0.836259		1.16922		0.807084		1.30533		0.853904		1.22596		0.602033		0.937082		0.814593		1.05849		0.700992		1.23647		0.909864		1.33899		0.861326		1.71646		1.0647		1.47807		0.833813		1.94844		0.9939		1.76382		2.07366
14	0.9722		1.31386		2.20376		7.27962		0.384891		0.535502		1.78109		5.83343		0.666254		0.935153		0.846585		1.5613		0.574606		0.768256		0.779794		1.05881		0.761178		1.08888		0.900836		1.53527		0.658244		0.933107		1.00151		1.15332		1.15642
15	1.14513		1.04144		2.30207		2.62866		1.18613		1.26685		1.75461		2.57342		0.777808		0.740722		1.19792		1.57927		0.72797		0.84462		1.21098		1.60109		0.615554		0.79387		0.810566		1.1469		0.767583		1.0168		1.08274		1.56967		1.42905
1st quartile	0.67775		0.968812		0.998101		1.38538		0.807084		1.02505		1.15977		1.53758		0.777808		0.935153		0.846585		1.07291		0.72797		1.16378		0.909864		1.2159		0.832365		1.08888		1.0647		1.4357		0.864299		1.0168		1.02012		1.34151		1.77796
3rd quartile	1.69602		2.27797		2.43441		4.01857		1.95846		1.97799		2.31695		4.3433		1.44005		2.19641		1.83998		3.30456		1.55756		2.09737		2.15464		3.16872		1.67318		2.25979		1.97227		2.26181		1.50257		2.27554		2.40544		2.47547		3.66788
median	1.10645		1.57542		1.47413		2.05137		1.28027		1.37492		1.75461		2.57342		1.02307		1.18725		1.25979		1.57927		0.956378		1.32575		1.21098		1.60109		1.16363		1.71646		1.54912		1.80908		1.15583		1.63763		1.29648		1.86357		2.51282
1st quartile-1.5×IQR	-0.656039		-0.73107		-0.293872		-2.12881		-0.448534		-0.576671		-0.119286		-0.822374		-0.0117451		-0.254155		-0.076175		-1.04414		-0.250197		0.144151		-0.315176		-0.887168		0.042842		-0.152936		0.240345		0.126632		0.155292		-0.566707		0.0534506		-0.203178		-1.32298
3rd quartile+1.5×IQR	3.02981		3.97785		3.72639		7.53276		3.21408		3.57971		3.59601		6.70326		2.2296		3.38571		2.76274		5.42161		2.53573		3.117		3.37968		5.27179		2.4627		3.50161		2.79663		3.57087		2.21157		3.85905		3.37211		4.02016		6.76882
Alpha
ID	Fp1								Fp2								F3								F4								C3								C4								P3
	BP				UP				BP				UP				BP				UP				BP				UP				BP				UP				BP				UP				BP
	EO		EC		EO		EC		EO		EC		EO		EC		EO		EC		EO		EC		EO		EC		EO		EC		EO		EC		EO		EC		EO		EC		EO		EC		EO
1	0.41522		1.24712		0.696399		0.996278		0.465586		0.767754		0.855052		1.14293		0.446261		1.13241		0.306544		0.544721		0.503086		0.672586		0.538804		0.57601		0.738997		1.82125		0.469532		1.10382		0.778982		1.53365		0.501075		1.0779		1.22552
2	0.724509		1.02863		0.87774		2.37415		0.754432		1.16919		0.656583		1.31134		0.458302		0.758331		0.476924		1.13855		0.830634		0.882202		0.624982		1.33277		0.439184		0.950606		0.522361		0.901687		0.461921		1.01917		0.502677		0.788598		0.744848
3	0.926524		1.00792		1.13844		1.12193		1.11564		1.30451		1.16393		1.1817		0.715043		0.76218		0.80984		0.794108		0.842145		0.943955		0.876723		0.820553		1.69383		1.59643		1.49358		1.31832		1.84028		1.28453		1.86016		1.2207		3.21192
4	0.411813		0.945428		0.325665		1.37836		0.790161		1.46475		0.77923		1.633		0.701748		1.38133		0.511547		2.28557		0.481367		1.30778		0.510557		1.25758		1.01348		9.12721		0.704641		9.28419		0.814364		6.83245		0.476227		6.52343		3.53105
5	0.406018		0.529614		0.398931		0.517889		0.525883		0.594031		0.595548		0.737934		0.422365		0.478916		0.541443		0.659337		0.517363		0.606803		0.668507		0.748563		0.76717		1.80609		0.935456		1.14003		0.862312		1.26913		1.08727		0.995691		2.02245
6	0.253422		0.275649		0.281448		0.368083		0.324399		0.390662		0.460925		0.575376		0.350668		0.340573		0.34002		0.447599		0.401771		0.486985		0.440856		0.546609		0.648092		0.656694		0.633821		0.737447		0.613028		0.694478		0.712221		0.8823		1.15155
7	0.510395		1.21437		0.41338		0.693875		0.821597		1.13743		0.47667		0.624752		0.375325		0.88579		0.371032		0.653554		0.407114		0.541625		0.342591		0.451097		1.22058		3.05178		1.24587		2.07858		0.89893		1.78509		0.699059		1.11052		4.86455
8	1.17574		12.69		0.753826		6.95865		1.1612		14.5111		0.773532		7.72381		1.43731		6.40256		0.792463		3.53623		0.92148		6.01854		0.7218		3.42567		4.28062		15.6		1.48447		11.6607		2.31703		11.1041		1.33777		8.54974		3.66349
9	3.27687		3.18701		2.1873		1.53566		3.53157		3.28718		1.98542		1.57587		2.49512		2.31798		1.79032		1.24133		2.55455		2.41722		1.76054		1.51061		4.38194		5.14512		3.3695		3.93009		3.71805		6.11961		3.4007		2.37498		21.7244
10	0.579068		1.5472		0.476877		0.988646		0.436073		1.41572		0.376721		0.80517		0.490818		1.21118		0.346297		0.787973		0.485629		1.54984		0.383371		0.803609		0.593048		3.20151		0.465264		2.94579		0.585505		3.60964		0.519786		3.81294		1.86046
11	0.771799		0.7593		0.702522		1.06683		0.592589		0.729075		0.687043		1.10603		0.779953		0.73614		0.603622		0.833079		0.679185		0.755761		0.662878		1.12626		0.973963		1.02339		0.786409		1.01697		0.860915		1.16234		0.814215		1.16147		1.59066
12	1.02618		1.57626		0.845881		3.30566		1.48215		1.96505		1.20889		4.27943		0.950961		1.47621		0.890911		3.14387		1.21867		1.60327		0.913261		4.0743		1.9186		3.68948		1.33042		6.58416		1.74635		3.74829		0.997364		7.89987		8.034
13	0.570854		1.04847		0.569731		1.15476		0.838244		1.85983		0.582851		1.22252		0.810478		1.60242		0.58366		0.982043		0.926586		2.27664		0.655473		1.59132		1.99979		8.98366		1.85052		6.69146		2.90302		8.12025		3.07093		9.00755		7.84185
14	0.454512		0.902603		0.962913		2.77037		0.169272		0.45051		0.82168		2.52526		0.290631		0.551106		0.313373		0.691782		0.26528		0.525686		0.369152		0.571991		0.352608		1.07218		0.380598		1.23214		0.35773		0.92671		0.399288		0.977029		0.702977
15	0.641644		2.86606		0.941889		2.1361		0.795482		3.45073		0.594006		1.76474		0.492012		1.55481		0.534316		1.20888		0.575298		2.09836		0.475316		1.05897		0.611511		2.98141		0.532957		1.7166		0.744865		4.78152		0.716221		2.01658		1.57518
1st quartile	0.41522		0.902603		0.41338		0.988646		0.465586		0.729075		0.582851		0.80517		0.422365		0.73614		0.346297		0.659337		0.481367		0.606803		0.440856		0.57601		0.611511		1.07218		0.522361		1.10382		0.613028		1.16234		0.502677		0.995691		1.22552
3rd quartile	0.926524		1.57626		0.941889		2.37415		1.11564		1.96505		0.855052		1.76474		0.810478		1.55481		0.792463		1.24133		0.92148		2.09836		0.7218		1.51061		1.9186		5.14512		1.48447		6.58416		1.84028		6.11961		1.33777		6.52343		4.86455
median	0.579068		1.04847		0.702522		1.15476		0.790161		1.30451		0.687043		1.22252		0.492012		1.13241		0.534316		0.833079		0.575298		0.943955		0.624982		1.05897		0.973963		2.98141		0.786409		1.7166		0.860915		1.78509		0.716221		1.2207		2.02245
1st quartile-1.5×IQR	-0.677583		-3.66446		-0.288561		-1.48707		-0.732435		-4.52259		-0.0215331		-1.98998		-0.427636		-1.46834		-0.215411		-0.770561		-0.350854		-1.5103		-0.0831209		-1.00474		-1.30847		-5.17555		-0.65037		-4.08004		-0.880286		-3.60655		-0.901681		-3.67702		-6.82637
3rd quartile+1.5×IQR	2.01933		6.14332		1.64383		4.84987		2.31366		7.21672		1.45944		4.55989		1.66048		3.75929		1.35417		2.67123		1.7537		4.21546		1.24578		3.09136		3.83858		11.3929		2.6572		11.768		3.33359		10.8885		2.74213		11.1961		12.9164
Beta
ID	Fp1								Fp2								F3								F4								C3								C4								P3
	BP				UP				BP				UP				BP				UP				BP				UP				BP				UP				BP				UP				BP
	EO		EC		EO		EC		EO		EC		EO		EC		EO		EC		EO		EC		EO		EC		EO		EC		EO		EC		EO		EC		EO		EC		EO		EC		EO
1	0.613305		0.723845		1.07909		1.08113		0.911218		0.713097		1.40106		1.4397		0.730795		0.725122		0.388792		0.470506		0.84436		0.815126		1.15614		0.761346		0.732738		0.941595		0.643168		0.849496		0.685644		1.00467		0.582957		0.696989		1.59785
2	0.936462		0.97293		1.11583		2.14674		0.984367		1.07902		0.863259		1.27818		0.754512		0.944927		0.74867		1.19671		1.09784		1.11938		1.06336		1.41645		0.722361		0.935163		0.763753		1.0123		0.672084		0.851484		0.677887		0.88709		1.08102
3	2.41783		2.7147		2.34316		2.63299		2.92072		3.073		2.63778		2.90981		2.30316		2.20781		1.91954		1.96622		2.6143		2.58001		2.44976		2.33882		3.36296		2.74465		3.08192		3.1712		3.95362		3.96215		4.07551		4.19669		5.85405
4	0.335804		0.377679		0.42581		0.586099		2.20173		2.20708		2.40331		2.12151		0.515386		0.573234		0.533217		1.26579		0.561859		0.666365		0.701805		0.868752		0.60477		1.16696		0.619625		1.9856		0.508463		1.09842		0.515257		1.31694		1.25137
5	0.76512		0.50116		0.585557		0.566204		1.5554		0.995856		0.924924		0.830066		0.845931		0.718919		0.830528		0.829357		1.36948		1.0675		1.08004		1.03314		0.747097		0.89969		1.12905		1.04554		0.786313		0.847606		1.08431		1.00418		1.67856
6	0.483917		0.41183		0.467542		0.427937		0.833182		0.603787		1.30217		0.644465		0.636575		0.520025		0.616981		0.63787		0.738922		0.744789		0.836693		0.740284		0.802031		0.801999		0.837926		0.837074		0.805673		0.746217		0.775857		0.851209		1.22924
7	0.751362		0.752085		0.414579		0.475318		1.56091		1.10831		0.647242		0.67554		0.521157		0.587445		0.388589		0.5161		0.909425		0.689009		0.548615		0.602881		1.17397		1.18549		0.973151		1.0731		0.5181		0.626		0.458711		0.500939		1.43842
8	0.971558		1.26442		1.10304		1.0547		1.88201		1.58922		1.87132		1.3112		0.736925		1.03782		0.806875		0.924735		1.05139		0.815067		2.50681		0.722557		1.17102		1.72306		0.889834		1.1263		0.887031		1.59096		0.819068		1.18888		1.81175
9	1.53846		1.51626		1.17301		1.31307		1.53993		1.51703		1.22857		1.25397		1.03706		1.00659		0.994018		1.05629		1.27436		1.32957		1.41306		1.45012		1.09932		1.26461		1.0422		1.275		1.1893		1.38457		1.21654		1.25934		3.36066
10	0.619761		0.782878		1.23407		0.748116		0.541034		0.839874		0.597475		0.496555		0.441273		0.553974		0.390849		0.445983		0.612088		0.949049		0.460962		0.514154		0.460809		0.727223		0.406455		0.637545		0.508273		0.834981		0.469979		0.748544		1.06354
11	0.729318		0.950675		0.913307		0.96067		0.755435		1.01553		0.896135		0.879201		0.823457		0.892594		0.846243		0.938581		1.02798		1.03117		0.938433		0.937596		1.85624		1.54766		0.910343		1.00631		2.40293		2.26868		1.2198		1.14887		2.05188
12	1.27782		1.6037		1.62536		1.89326		1.8633		2.18366		2.36014		2.56431		1.31485		1.81036		1.79921		2.17723		1.76093		2.04477		2.06888		2.43947		1.54025		2.06106		1.70977		2.70441		1.52001		2.00675		1.60381		2.54754		3.42857
13	0.277479		0.386856		0.512336		0.576986		0.653392		1.00542		0.751947		0.530854		0.426468		0.579547		0.427814		0.486478		0.554041		0.945542		0.532166		0.625537		0.665542		1.24633		0.608962		1.05847		0.569298		1.27686		0.630485		1.12599		1.61321
14	0.595052		1.27087		1.5362		2.88391		0.261782		0.374783		1.23279		2.34191		0.447653		0.639301		0.568948		0.758911		0.5363		0.596583		0.80238		0.623347		0.525002		0.80713		0.578939		0.972573		0.710579		0.952332		0.655328		1.16056		0.754228
15	1.1323		1.80108		1.08734		1.42664		1.38566		2.21182		1.00919		1.3678		0.844793		1.23886		0.709399		1.01014		0.924114		1.46381		0.792359		1.00481		0.807066		2.13322		0.729171		1.40318		1.11222		2.79783		0.887887		1.75025		1.91106
1st quartile	0.595052		0.50116		0.512336		0.576986		0.755435		0.839874		0.863259		0.67554		0.515386		0.579547		0.427814		0.5161		0.612088		0.744789		0.701805		0.625537		0.665542		0.89969		0.619625		0.972573		0.569298		0.847606		0.582957		0.851209		1.22924
3rd quartile	1.1323		1.51626		1.23407		1.89326		1.8633		2.18366		1.87132		2.12151		0.845931		1.03782		0.846243		1.19671		1.27436		1.32957		1.41306		1.41645		1.17397		1.72306		1.0422		1.40318		1.1893		2.00675		1.21654		1.31694		2.05188
median	0.751362		0.950675		1.08734		1.0547		1.38566		1.07902		1.22857		1.27818		0.736925		0.725122		0.709399		0.924735		0.924114		0.949049		0.938433		0.868752		0.802031		1.18549		0.837926		1.05847		0.786313		1.09842		0.775857		1.14887		1.61321
1st quartile-1.5×IQR	-0.218326		-0.466925		-0.284724		-0.6173		-0.314519		-0.285699		-0.138966		-0.482511		-0.197759		-0.156369		-0.278673		-0.259008		-0.211559		-0.0778952		-0.301733		-0.276457		-0.442804		0.0172553		-0.361295		-0.107849		-0.823777		-0.540456		-0.766619		-0.534643		-0.73263
3rd quartile+1.5×IQR	1.94568		2.48434		2.03113		3.08755		2.93325		3.30923		2.87354		3.27956		1.55907		1.77373		1.55273		1.97182		2.09801		2.15225		2.41659		2.31844		2.28232		2.6055		2.02312		2.4836		2.58237		3.39481		2.56611		2.7028		4.01375
Gamma
ID	Fp1								Fp2								F3								F4								C3								C4								P3
	BP				UP				BP				UP				BP				UP				BP				UP				BP				UP				BP				UP				BP
	EO		EC		EO		EC		EO		EC		EO		EC		EO		EC		EO		EC		EO		EC		EO		EC		EO		EC		EO		EC		EO		EC		EO		EC		EO
1	0.652608		0.518446		1.18214		0.981329		0.993065		0.720004		1.60901		1.61135		0.573673		0.393571		0.323035		0.311181		0.94829		0.724651		1.447		0.841659		0.41871		0.410072		0.405602		0.433487		0.365557		0.444258		0.358624		0.383548		0.654689
2	0.889545		0.7833		1.27817		1.90534		0.88066		0.861241		0.864354		1.11858		0.721015		0.71249		0.791594		1.14851		0.957199		0.966691		1.1596		1.22533		0.686949		0.712271		0.695961		0.830542		0.522006		0.567726		0.574531		0.675938		0.656208
3	0.949157		1.15309		0.918422		1.44778		1.14684		1.6804		1.03661		1.70962		0.905026		0.930536		0.538495		0.654052		0.620929		0.762622		0.597941		0.748876		0.607779		0.577875		0.570499		0.651413		0.617773		0.619671		1.22509		1.43684		1.10918
4	0.304548		0.312211		0.418727		0.722962		4.40061		4.05254		5.34304		3.90611		0.362943		0.380644		0.350631		1.27918		0.387093		0.367427		0.561767		0.983224		0.43579		0.431059		0.521801		4.03796		0.331584		0.358993		0.432001		1.92675		0.743177
5	0.76512		0.50116		0.585557		0.566204		1.5554		0.995856		0.924924		0.830066		0.845931		0.718919		0.830528		0.829357		1.36948		1.0675		1.08004		1.03314		0.747097		0.89969		1.12905		1.04554		0.786313		0.847606		1.08431		1.00418		1.67856
6	0.435882		0.444997		0.625293		0.304277		1.17244		0.623089		2.65855		0.533507		0.47139		0.445989		0.505762		0.405502		0.567568		0.561322		0.897251		0.472168		0.561195		0.571423		0.646668		0.573906		0.789818		0.677595		0.858206		0.737899		0.726807
7	0.53053		0.423437		0.303478		0.303075		2.04141		0.74697		0.547953		0.465448		0.325348		0.28225		0.247617		0.247271		0.496778		0.275664		0.259775		0.25581		1.67486		1.307		1.48678		1.61043		0.247418		0.232554		0.234414		0.235835		0.447893
8	0.686218		0.500067		1.62509		0.821999		2.16294		1.02999		3.19683		1.42065		0.419885		0.448271		1.12916		0.739411		0.872847		0.353387		4.36587		0.575147		0.384341		0.44979		0.620489		0.560919		0.315242		0.368501		0.561588		0.664011		0.632374
9	1.16352		1.27944		1.05212		2.41302		0.898849		0.978295		1.00172		2.04224		0.600665		0.651158		0.706307		1.28795		0.659807		0.697117		1.2859		1.89572		0.486151		0.483943		0.533102		1.47907		0.561876		0.535818		0.516514		1.43429		0.830502
10	0.835565		0.792893		3.74927		1.18046		0.717993		0.915005		1.28753		0.613444		0.424033		0.443224		0.578064		0.451554		0.94798		1.21679		0.715248		0.620988		0.420387		0.340984		0.440198		0.350313		0.451797		0.328511		0.468893		0.38206		0.984639
11	1.07922		1.4859		1.08756		1.49657		1.13804		1.54066		0.921121		1.24851		1.47518		1.53766		1.33552		1.47428		1.6679		1.61488		1.00106		1.32613		4.55297		3.82563		1.52403		1.77833		8.57305		6.49862		1.81399		2.20017		2.98936
12	0.557789		0.56286		0.962263		0.998154		0.883993		0.869866		1.7768		1.81761		0.600355		0.629679		1.06948		1.06912		0.603862		0.571081		1.08895		1.17684		0.594202		0.639787		0.798303		0.861966		0.653239		0.565427		0.756463		0.778148		1.05127
13	0.233747		0.284984		0.588521		0.645491		0.536777		0.700723		1.07777		0.563487		0.294239		0.446445		0.337047		0.325597		0.313819		0.434503		0.337688		0.355316		0.435216		0.675288		0.392018		0.459248		0.256808		0.334333		0.284718		0.310509		0.522981
14	0.716484		1.1362		2.20305		6.23326		0.30477		0.304383		1.77379		5.05235		0.730401		0.760125		0.688575		1.02631		0.851213		0.789403		1.24649		0.790739		0.691219		0.801162		0.873833		1.39328		1.61214		1.59635		1.04929		2.05945		0.630637
15	0.554374		0.508373		0.837603		1.00795		0.889023		0.608652		0.638551		0.751451		0.354021		0.34601		0.440471		0.534904		0.35337		0.331238		0.396794		0.505607		0.337218		0.364812		0.365853		0.431513		0.315076		0.329151		0.355075		0.476047		0.625478
1st quartile	0.53053		0.444997		0.588521		0.645491		0.88066		0.700723		0.921121		0.613444		0.362943		0.393571		0.350631		0.405502		0.496778		0.367427		0.561767		0.505607		0.420387		0.431059		0.440198		0.459248		0.315242		0.334333		0.358624		0.383548		0.630637
3rd quartile	0.889545		1.1362		1.27817		1.49657		1.5554		1.02999		1.7768		1.81761		0.730401		0.718919		0.830528		1.14851		0.94829		0.966691		1.24649		1.17684		0.691219		0.801162		0.873833		1.47907		0.786313		0.677595		1.04929		1.43684		1.05127
median	0.686218		0.518446		0.962263		0.998154		0.993065		0.869866		1.07777		1.24851		0.573673		0.448271		0.578064		0.739411		0.659807		0.697117		1.00106		0.790739		0.561195		0.577875		0.620489		0.830542		0.522006		0.535818		0.561588		0.737899		0.726807
1st quartile-1.5×IQR	0.13079		-0.121141		-0.708466		-1.53755		-0.604301		-0.626012		-0.969801		-1.33647		-0.0970641		-0.0798246		-0.135505		-0.20341		-0.0683045		-0.195573		-0.904009		-0.143285		-1.18234		-0.865913		-0.119806		-0.949393		-2.83063		-2.01944		-0.291858		-0.61683		-0.330629
3rd quartile+1.5×IQR	1.28929		1.70233		2.57516		3.67961		3.04036		2.35673		3.66772		3.76752		1.19041		1.19231		1.31666		1.75743		1.51337		1.52969		2.71227		1.82574		2.29395		2.09813		1.43384		2.88771		3.93219		3.03137		1.69977		2.43722		2.01254
